# Supplementary material for: A Transcriptomic Analysis of Head and Neck Squamous Cell Carcinomas for Prognostic Indications
Source: MDPI journal article supplement (doi:10.3390/jpm11080782), 2021-08-11
Supplement: s1 [file s1]

| Gene ID | Gene Description                                           | Kaplan-Meier survival |                              | Univariate |             | Multivariate |             |
|---------|------------------------------------------------------------|-----------------------|------------------------------|------------|-------------|--------------|-------------|
|         |                                                            | FDR<br><i>P</i> value | Bonferroni<br><i>P</i> value | HR*        | 95% CI      | HR*          | 95% CI      |
| DKK1    | dickkopf WNT signaling pathway inhibitor 1                 | $3.8 \times 10^{-6}$  | 0.001                        | 2.266      | 1.666-3.082 | 2.135        | 1.559-2.924 |
| CAMK2N1 | calcium/calmodulin-dependent protein kinase II inhibitor 1 | $1.5 \times 10^{-5}$  | 0.002                        | 2.101      | 1.572-2.809 | 2.007        | 1.490-2.704 |
| STC2    | stanniocalcin 2                                            | $1.5 \times 10^{-5}$  | 0.004                        | 2.147      | 1.578-2.921 | 2.075        | 1.515-2.843 |
| PGK1    | phosphoglycerate kinase 1                                  | $2.4 \times 10^{-5}$  | 0.006                        | 2.127      | 1.563-2.895 | 2.046        | 1.498-2.795 |
| SURF4   | surfeit 4                                                  | $6.2 \times 10^{-5}$  | 0.006                        | 2.055      | 1.531-2.757 | 2.089        | 1.543-2.829 |
| USP10   | ubiquitin specific peptidase 10                            | $7.9 \times 10^{-5}$  | 0.012                        | 2.083      | 1.532-2.834 | 2.119        | 1.551-2.895 |
| NDFIP1  | Nedd4 family interacting protein 1                         | $1.1 \times 10^{-4}$  | 0.017                        | 2.031      | 1.502-2.746 | 2.027        | 1.483-2.771 |
| FOXA2   | forkhead box A2                                            | $1.6 \times 10^{-4}$  | 0.018                        | 1.976      | 1.479-2.640 | 1.914        | 1.426-2.569 |
| STIP1   | stress-induced-phosphoprotein 1                            | $1.8 \times 10^{-4}$  | 0.029                        | 1.958      | 1.463-2.621 | 1.957        | 1.451-2.640 |
| DKC1    | dyskeratosis congenita 1, dyskerin                         | $2.8 \times 10^{-4}$  | 0.042                        | 2.046      | 1.490-2.808 | 1.837        | 1.332-2.534 |

Selection criteria:  
Kaplan-Meier Bonferroni-adjusted  $P < 0.05$   
Cox's univariate and multivariate  $HR > 1.5$   
(\* Cox's model:  $P < 0.001$ )

Table 2: The other top 10 genes overexpressed with better prognosis in the TCGA’s HNSCC (ranked by adjusted  $P$  value)

| Gene ID | Gene Description                   | Kaplan-Meier survival |                              | Univariate |             | Multivariate |             |
|---------|------------------------------------|-----------------------|------------------------------|------------|-------------|--------------|-------------|
|         |                                    | FDR<br><i>P</i> value | Bonferroni<br><i>P</i> value | HR*        | 95% CI      | HR*          | 95% CI      |
| ZNF557  | zinc finger protein 557            | $4.7 \times 10^{-6}$  | 0.001                        | 0.465      | 0.348-0.619 | 0.499        | 0.372-0.669 |
| ZNF266  | zinc finger protein 266            | $5.2 \times 10^{-6}$  | 0.001                        | 0.474      | 0.355-0.632 | 0.453        | 0.338-0.607 |
| IL19    | interleukin 19                     | $6.5 \times 10^{-6}$  | 0.002                        | 0.472      | 0.351-0.635 | 0.459        | 0.340-0.619 |
| MYO1H   | myosin 1H                          | $1.4 \times 10^{-5}$  | 0.003                        | 0.468      | 0.347-0.632 | 0.467        | 0.344-0.634 |
| FCGBP   | Fc fragment of IgG binding protein | $4.8 \times 10^{-5}$  | 0.008                        | 0.484      | 0.359-0.653 | 0.496        | 0.366-0.674 |
| EVPLL   | envoplakin-like protein            | $7.5 \times 10^{-5}$  | 0.013                        | 0.490      | 0.363-0.661 | 0.494        | 0.364-0.672 |
| PNMA5   | paraneoplastic antigen like 5      | $3.0 \times 10^{-4}$  | 0.017                        | 0.499      | 0.371-0.671 | 0.481        | 0.357-0.650 |
| IQCN    | IQ motif containing N              | $1.5 \times 10^{-4}$  | 0.020                        | 0.500      | 0.371-0.673 | 0.483        | 0.356-0.654 |
| NPB     | neuropeptide B                     | $2.6 \times 10^{-4}$  | 0.027                        | 0.460      | 0.328-0.646 | 0.457        | 0.324-0.646 |
| CALML5  | <a href="#">calmodulin like 5</a>  | $2.0 \times 10^{-4}$  | 0.039                        | 0.510      | 0.379-0.686 | 0.493        | 0.364-0.667 |

Selection criteria:

Kaplan-Meier Bonferroni-adjusted *P* value < 0.05

Cox's univariate and multivariate HR < 0.6

(\* Cox's model: *P* < 0.001)

Table 3: The consensus between the TCGA and GSE65858 cohorts in Kaplan-Meier survival and Cox’s model

| Gene Symbol | KM <i>P</i> value     |                       | FDR-adjusted <i>P</i> value |          | Cox's univariate HR |          |
|-------------|-----------------------|-----------------------|-----------------------------|----------|---------------------|----------|
|             | TCGA                  | GSE65858              | TCGA                        | GSE65858 | TCGA                | GSE65858 |
| CAMK2N1     | $2.97 \times 10^{-7}$ | $6.87 \times 10^{-3}$ | $1.63 \times 10^{-5}$       | 0.038    | 2.101               | 1.814    |
| CALML5      | $5.87 \times 10^{-6}$ | $4.75 \times 10^{-3}$ | $1.97 \times 10^{-4}$       | 0.035    | 0.510               | 0.541    |
| FCGBP       | $1.21 \times 10^{-6}$ | 0.01                  | $4.83 \times 10^{-5}$       | 0.039    | 0.484               | 0.573    |

(FDR: **false discovery rate**; HR: hazard ratio)

## Supplementary Figure S1:

The gene NDFIP1, one of our 20 preliminary candidates, has a  $P$  value (around 0.05) at 50% quantile cutoff, achieving a  $P$  value of  $2.62 \times 10^{-6}$  at 70% quantile cutoff. After the FDR correction, NDFIP1 still has  $P$  value of  $1.07 \times 10^{-4}$ . However, NDFIP1 could not pass the validation by using GSE65858 cohort ( $n = 270$ ). NDFIP1 has KM  $P$  value less than 0.05 in GSE117973 cohort (a small HNSCC dataset,  $n = 87$ ).

## Supplementary Figure S2:

A head-to-head comparison of Kaplan–Meier estimates from TCGA HNSCC and GSE65858.

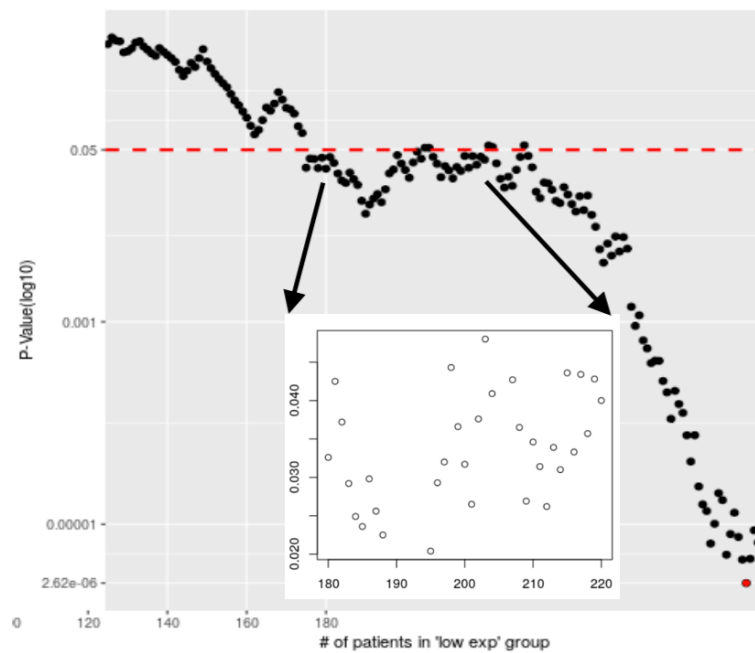

**Figure S1.** Under cutoff-finding procedure of Kaplan–Meier analysis, the  $P$ -value plot of gene "NDFIP1" shows: (1) 70% of  $P$  values is  $< 0.05$ ; (2) the median-cut zone (zoom-in and revealed in inset box) has a "W"-like distribution; (3) sliding-window cutoff selection could find its optimized  $P$  values (far less than 0.001) while a median cut might yield  $P$  value  $\geq 0.05$ . (x-axis: grouping by person number; y-axis:  $P$  value in log10 transformed)

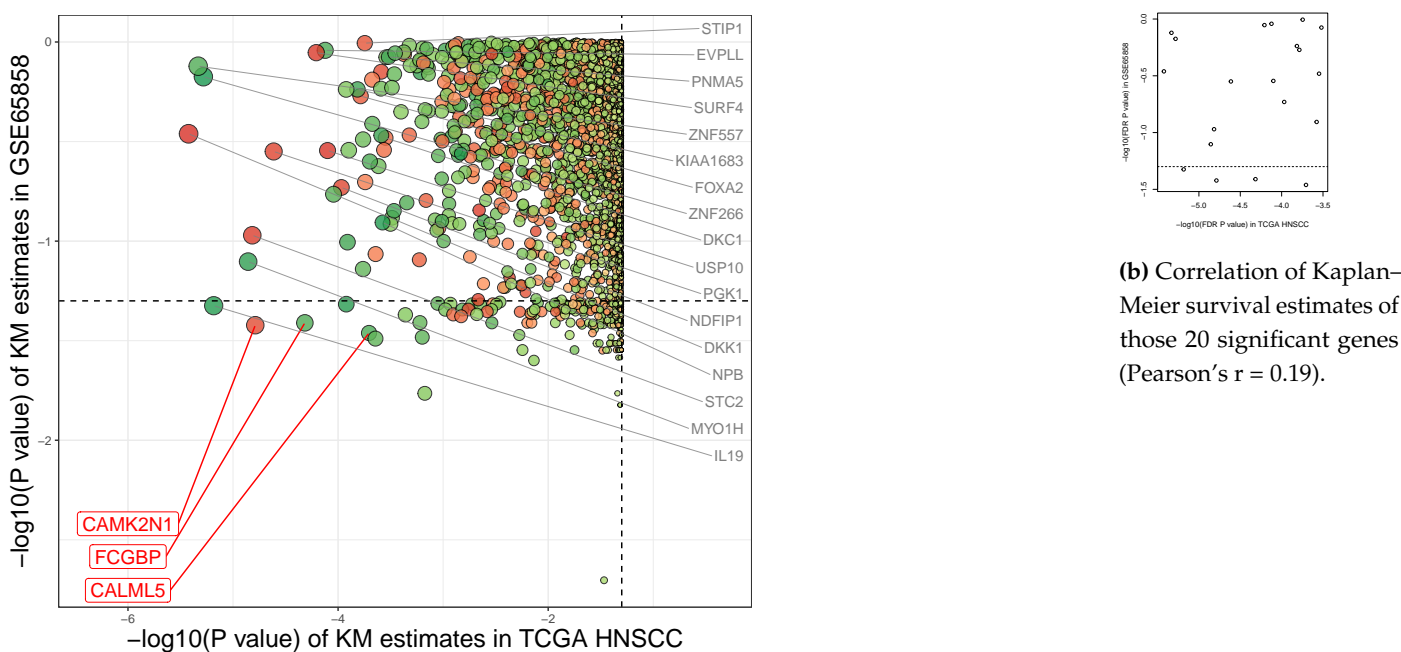

**(a)** Kaplan–Meier survival estimates from TCGA HNSCC and GSE65858 (Pearson’s correlation coefficient[1],  $r = 0.01$ ).

**Figure S2. A head-to-head comparison of  $-\log_{10}(\text{FDR-adjusted } P \text{ values})$  from TCGA HNSCC and GSE65858 datasets.** TCGA HNSCC and GSE65858 cohorts were applied for identification and validation of the candidate biomarkers in HNSCC. (a) A total of 5404 genes had FDR-adjusted  $P$  values of Kaplan–Meier estimates from TCGA HNSCC and GSE65858 (poor Pearson’s correlation,  $r = 0.01$ ). **CAMK2N1**, **CALML5**, **FCGBP**, and 17 genes (marked in black) had FDR-adjusted  $P$  values  $< 0.0003$  ( $\log_{10}(0.0003) = -3.5$ ) in TCGA HNSCC. **Red spots:**  $\text{HR} > 1.0$  in TCGA HNSCC. **Green spots:**  $\text{HR} < 1.0$  in TCGA HNSCC. Size of spots: bigger in smaller Kaplan–Meier  $P$  values in TCGA HNSCC. (b) The 20 genes were extracted and shown. The FDR-adjusted  $P$  values of those genes have poor correlation between the two cohorts (Pearson’s  $r = 0.19$ ). (X-axis: Kaplan–Meier survival estimates from TCGA HNSCC, with false discovery rate (FDR)-adjusted  $P$  values ( $\log_{10}$  transformed); Y-axis: Those values from GSE65858; TCGA: the Cancer Genome Atlas; HNSCC: head and neck squamous cell carcinoma. Dashed line: 0.05 (or  $\log_{10}$ -transformed as -1.3)

1. Schober, P.; Schwarte, L.A. Correlation coefficients: Appropriate use and interpretation. *Anesthesia and Analgesia* **2018**, *126*, 1763–1768. doi:10.1213/ANE.0000000000002864.
